# Supplementary material
Source: publisher figshare collection journal article supplement (https://acs.figshare.com/ndownloader/files/21833184)
Supplement: Supplementary file 1 [file 21833184]

# Supporting Information

## **Carbon Dioxide Reduction by Multimetallic Uranium(IV) Complexes Supported by Redox-Active Schiff Base Ligands**

Nadir Jori,<sup>a</sup> Marta Falcone,<sup>a</sup> Rosario Scopelliti<sup>a</sup> and Marinella Mazzanti<sup>\*a</sup>

[a] Institut des Sciences et Ingénierie Chimiques, Ecole Polytechnique Fédérale de Lausanne (EPFL), CH-1015 Lausanne, Switzerland.

\*Corresponding authors: E-mail: [marinella.mazzanti@epfl.ch](mailto:marinella.mazzanti@epfl.ch), ISIC/EPFL.

## Table of Contents

|    |                                         |            |
|----|-----------------------------------------|------------|
| 1. | <i>NMR spectra .....</i>                | <b>S3</b>  |
| 2. | <i>Mass spectra .....</i>               | <b>S14</b> |
| 3. | <i>Electrochemistry.....</i>            | <b>S15</b> |
| 4. | <i>UV-vis spectroscopy.....</i>         | <b>S20</b> |
| 5. | <i>X-ray crystallographic data.....</i> | <b>S21</b> |

# 1. NMR spectra

**Figure S1:**  $^1\text{H}$  NMR spectrum (400 MHz,  $\text{pyr-d}_5$ , 298 K) of  $\text{K}_3\text{tBuTrensAl}$

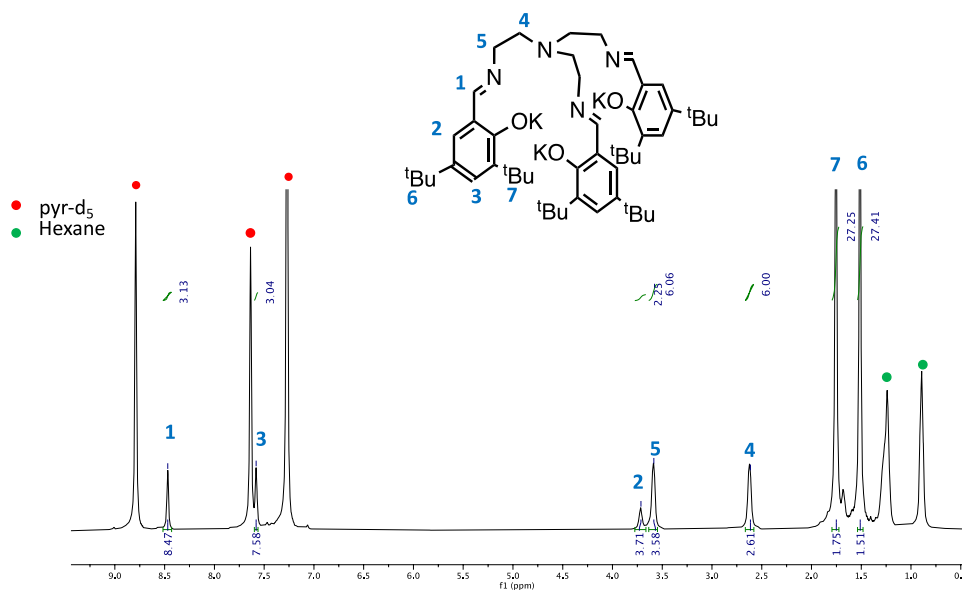

**Figure S2:**  $^{13}\text{C}$  NMR spectrum (100 MHz,  $\text{pyr-d}_5$ , 298 K) of  $\text{K}_3\text{tBuTrensAl}$

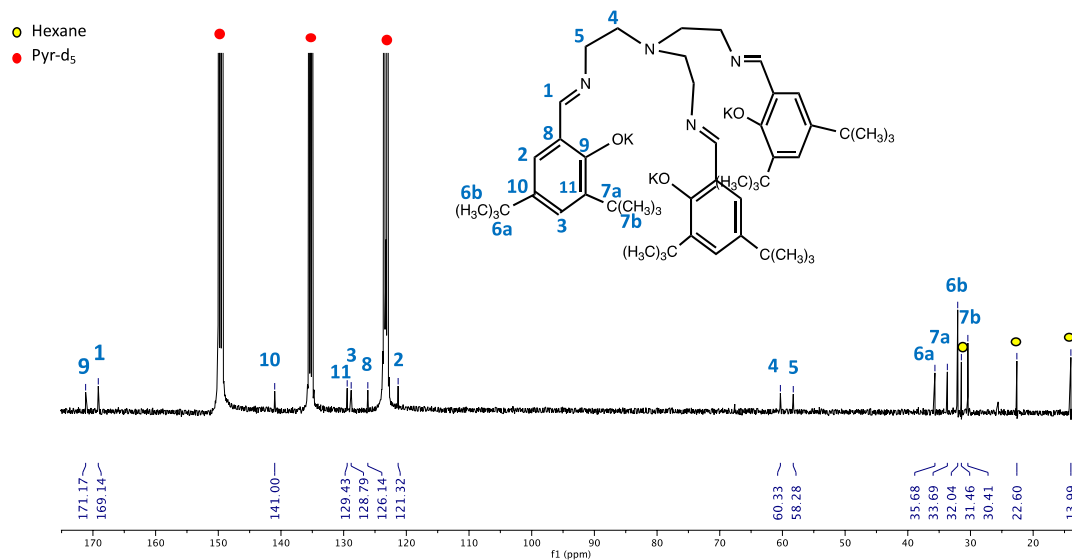

**Figure S3:**  $^1\text{H}$  NMR spectrum (400 MHz,  $\text{pyr-d}_5$ , 298 K) of **1**

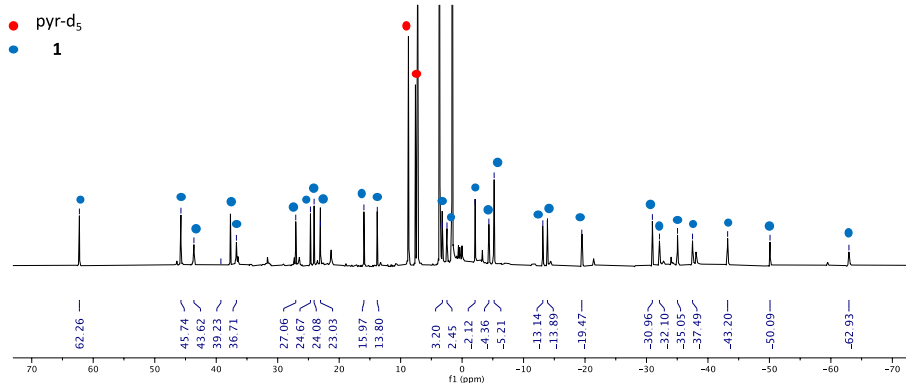

**Figure S4:**  $^1\text{H}$  -NMR spectrum (400 MHz,  $\text{THF-d}_8$ , 298 K) of isolated compound of synthesis of  $[\text{U}_2\text{-}^t\text{Bu-bis-trensal}]$ , complex **1a**

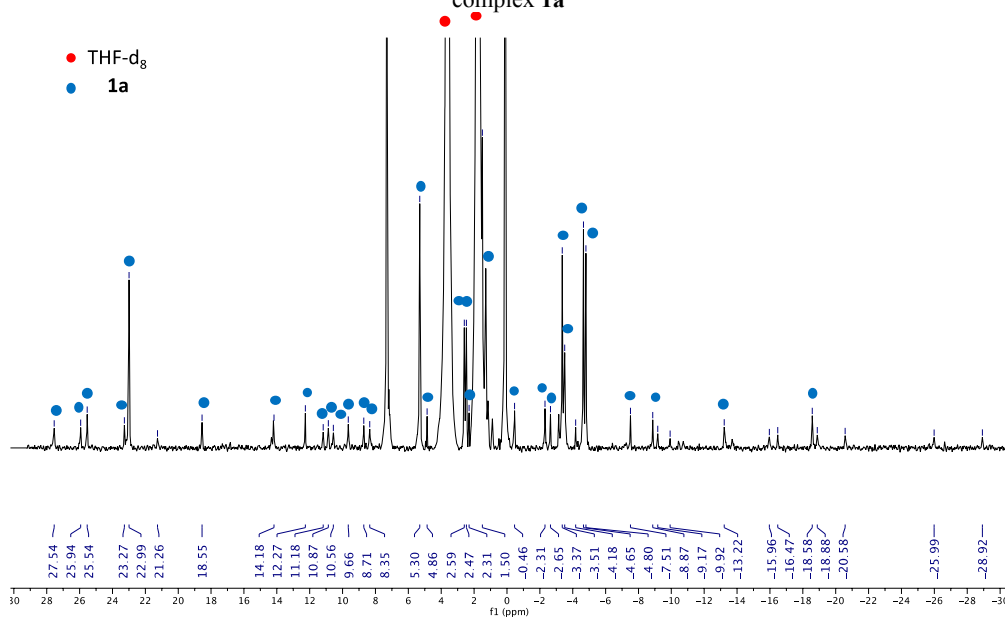

**Figure S5:**  $^1\text{H}$  NMR spectrum (400MHz,  $\text{THF-d}_8$ , 298 K) of  $[\text{U}(\text{trensal})][\text{OTf}]$ , complex **2**

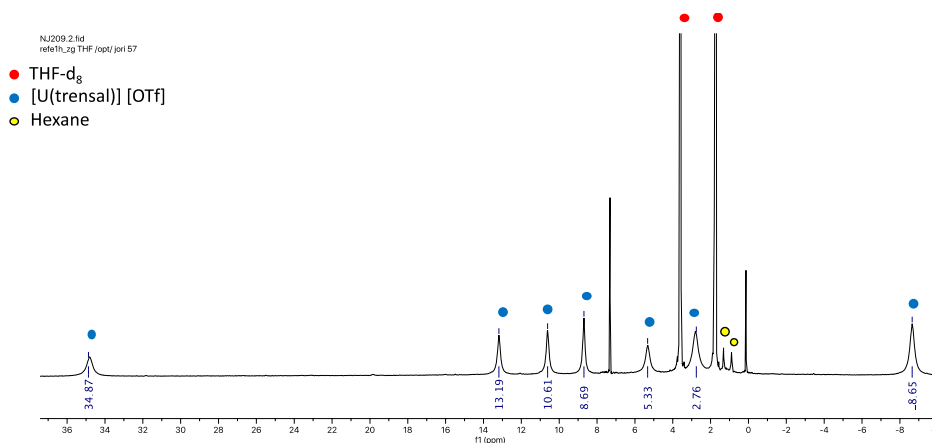

**Figure S6:**  $^1\text{H}$  NMR (400 MHz,  $\text{THF-d}_8$ , 298K) spectrum of reaction mixture of **1** with 100 eq  $^{13}\text{CO}_2$  after 6 days

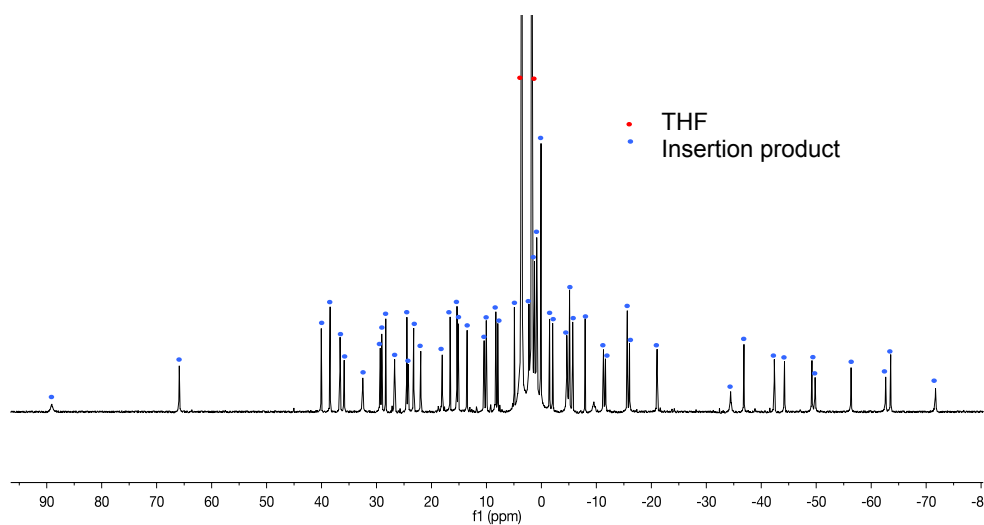

**Figure S7:**  $^{13}\text{C}\{^1\text{H}\}$  NMR (151 MHz,  $\text{THF-d}_8$ , 298K) spectrum of reaction mixture of **1** with 100 eq  $^{13}\text{CO}_2$  after 6 days.

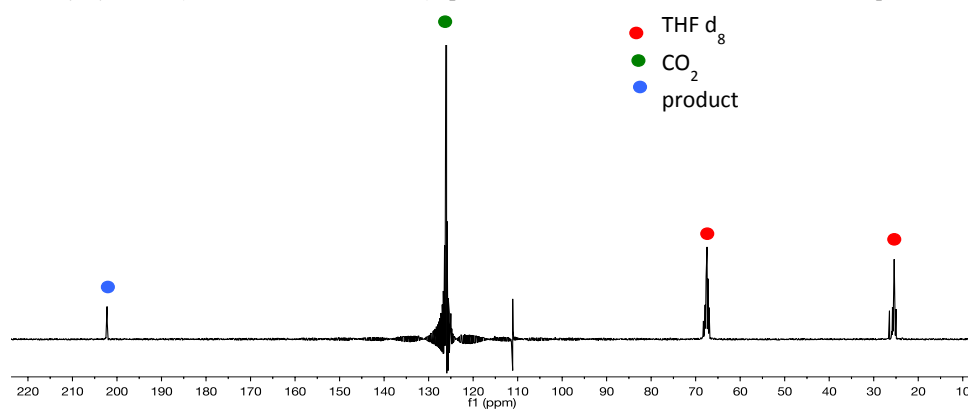

**Figure S8:**  $^{13}\text{C}\{^1\text{H}\}$  NMR spectrum (100 MHz,  $\text{DMSO-d}_6$ , 298 K) powder from reaction **1** + 100 eq  $^{13}\text{CO}_2$  after filtering and dissolving the powder in  $\text{DMSO-d}_6$ .

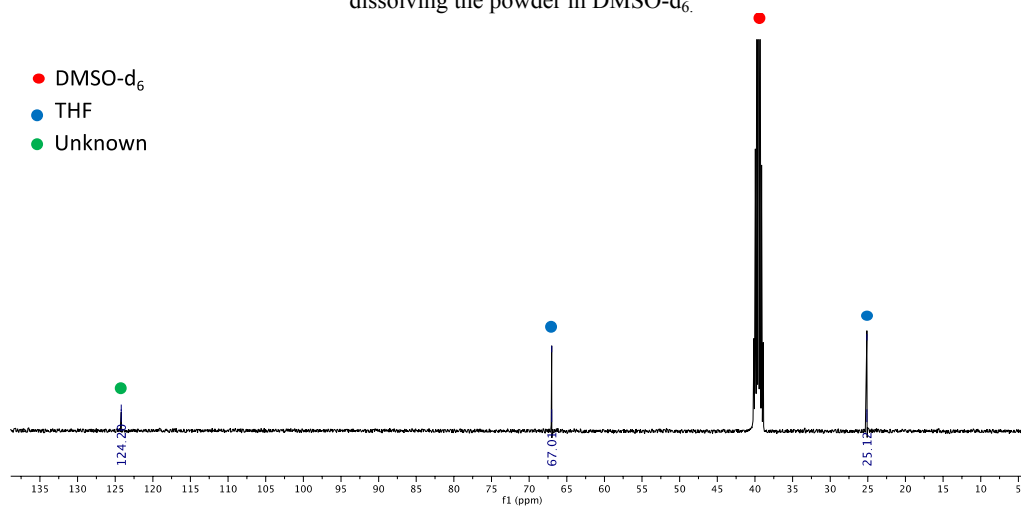

**Figure S9:**  $^1\text{H}$  NMR spectrum (400MHz,  $\text{THF-d}_8$ , 298 K) evolution of **1** with 2 eq  $^{13}\text{CO}_2$

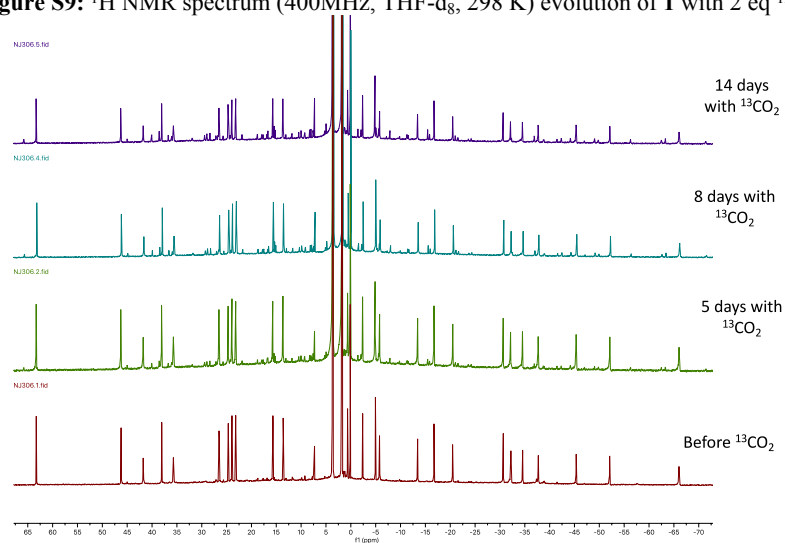

**Figure S10:**  $^{13}\text{C}\{^1\text{H}\}$  NMR (151 MHz,  $\text{D}_2\text{O}$ , 298K) of the supernatant of reaction mixture of **1** with 2 eq of  $^{13}\text{CO}_2$  after 20 days, after removing the solvent and dissolving in basic  $\text{D}_2\text{O}$  (pD= 12).  $\text{CD}_3\text{CN}$  was used as internal reference for the chemical shifts.

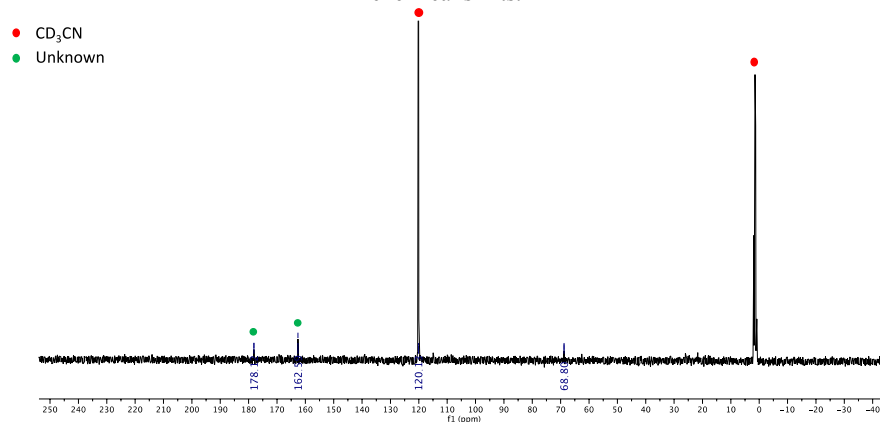

**Figure S11:**  $^{13}\text{C}\{^1\text{H}\}$  NMR (151 MHz,  $\text{D}_2\text{O}$ , 298K) of the solid of reaction mixture of **1** with 2 eq of  $^{13}\text{CO}_2$  after 20 days, dissolving in basic  $\text{D}_2\text{O}$  (pD= 12).  $\text{CD}_3\text{CN}$  was used as internal reference for the chemical shifts.

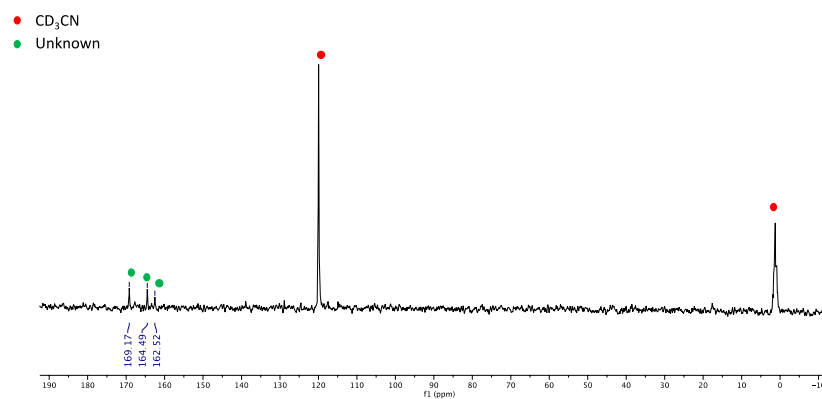

**Figure S12:**  $^1\text{H}$  NMR spectrum (400MHz, THF- $\text{d}_8$ , 298 K) evolution of **1** + 10 eq  $^{13}\text{CO}_2$ .

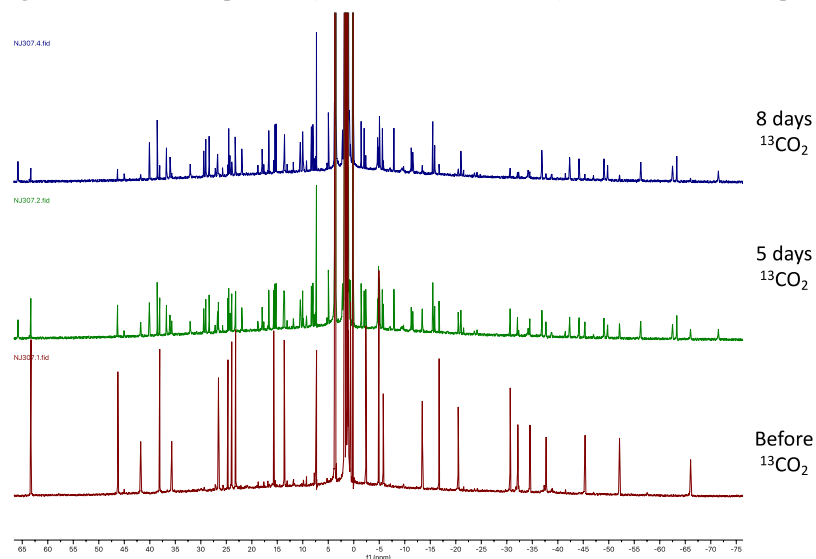

**Figure S13:**  $^1\text{H}$  NMR spectrum (400 MHz, pyr- $\text{d}_5$ , 298 K) of supernatant from reaction **1** + 10 eq  $^{13}\text{CO}_2$  after centrifuging and removing the solvent in vacuo.

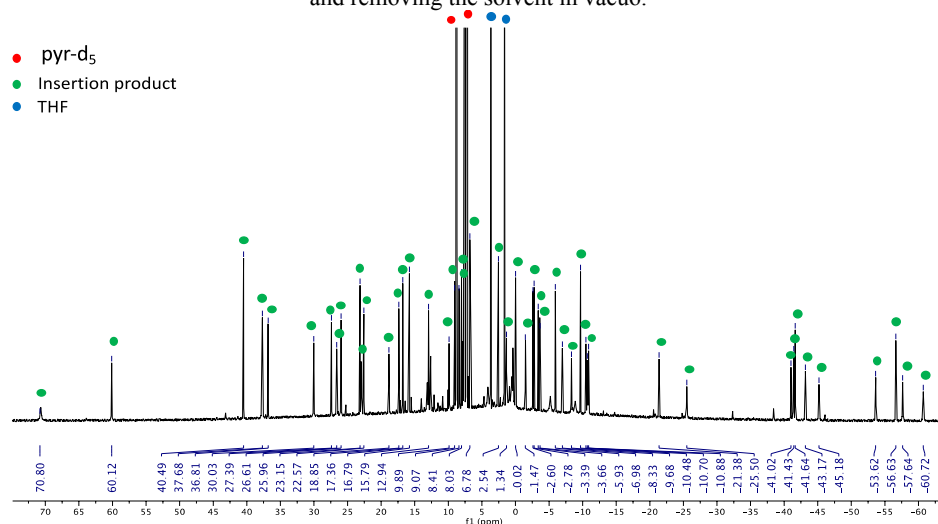

**Figure S14:**  $^{13}\text{C}\{^1\text{H}\}$  NMR spectrum (100 MHz, pyr- $\text{d}_5$ , 298 K) of supernatant from reaction **1** + 10 eq  $^{13}\text{CO}_2$  after centrifuging and removing the solvent in vacuo.

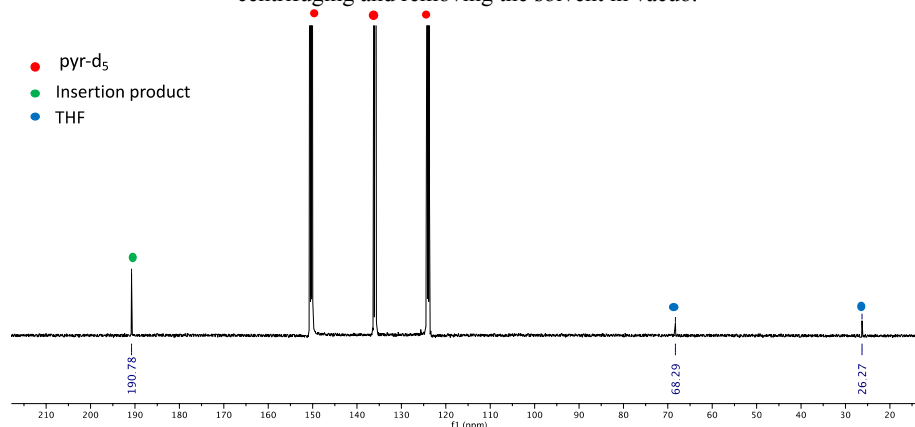

**Figure S15:**  $^1\text{H}$  NMR spectrum (400 MHz,  $\text{THF-d}_8$ , 298 K) evolution of reaction mixture **3** + 4 eq AgOTf.

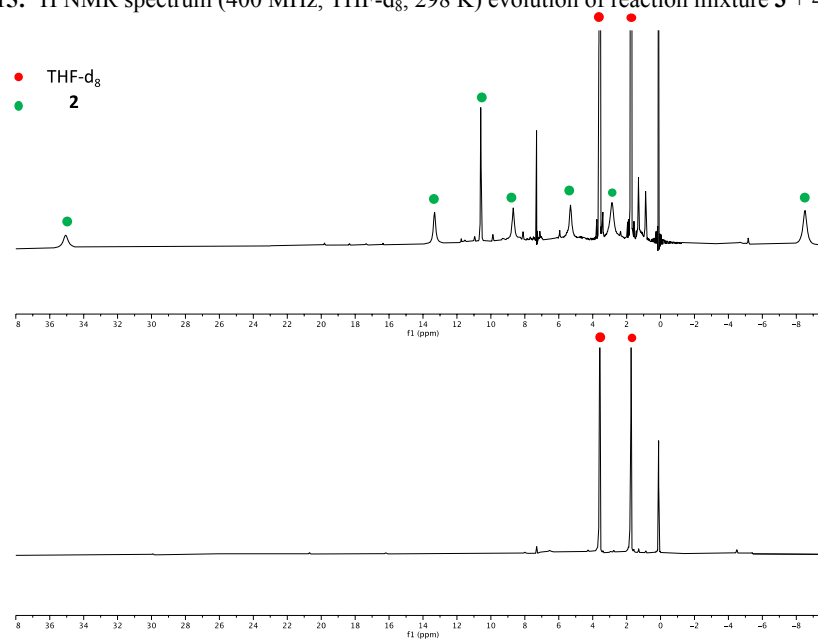

**Figure S16:**  $^1\text{H}$  NMR spectrum (400 MHz,  $\text{THF-d}_8$ , 298 K) of reaction mixture **3** + 2 eq AgOTf after filtering.

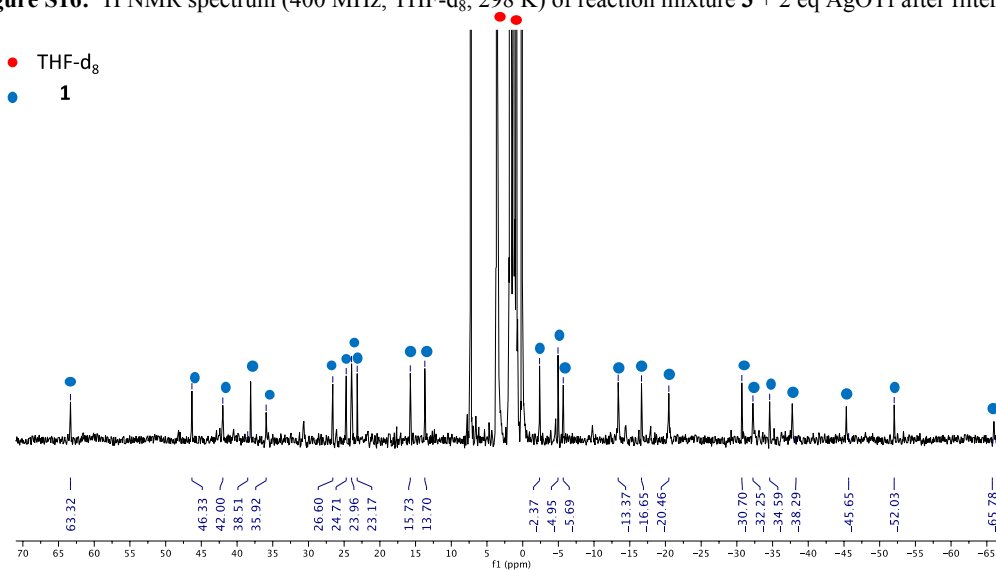



**Figure S17:**  $^1\text{H}$  NMR spectrum (400 MHz,  $\text{THF-d}_8$ , 298 K) comparison of reaction mixture **3** + 4 eq  $^{13}\text{CS}_2$ . (After two days and before).

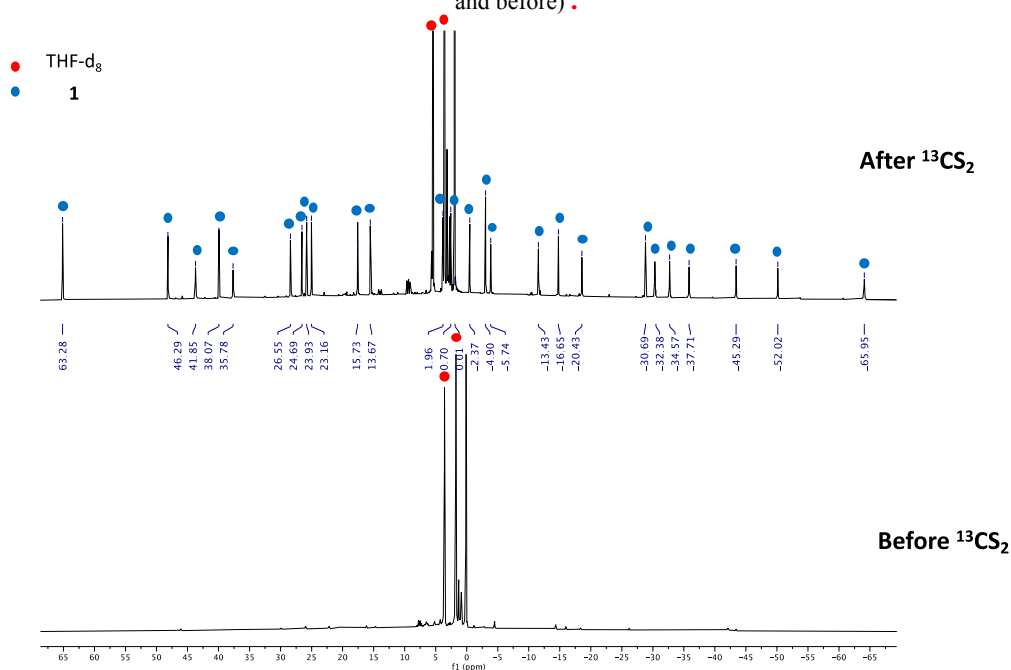

**Figure S18:**  $^{13}\text{C}\{^1\text{H}\}$  NMR spectrum (100 MHz,  $\text{THF-d}_8$ , 298 K) of reaction mixture **3** + 4 eq  $^{13}\text{CS}_2$  after two days.

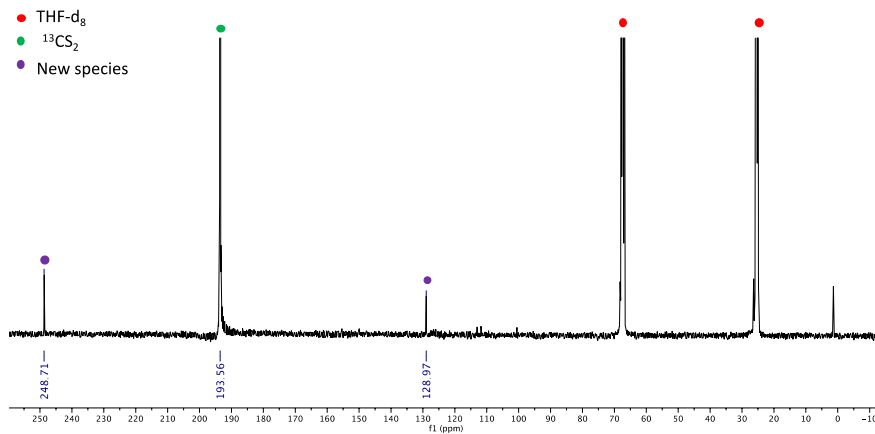

**Figure S19:**  $^1\text{H}$  NMR spectrum ( $\text{DMSO-d}_6$ , 400 MHz, 298K) of the reaction mixture after 2 days addition of 4 eq  $^{13}\text{CS}_2$  to a THF solution of **3** at room temperature, removal of the solvent and dissolution in  $\text{DMSO-d}_6$ .

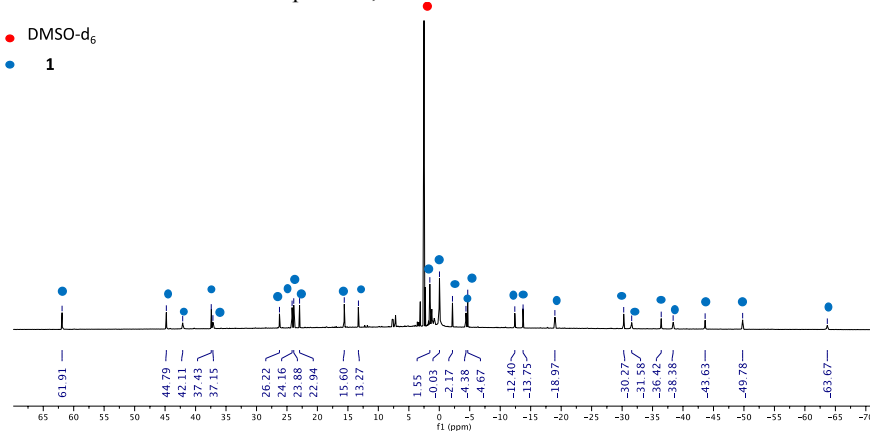

**Figure S20:**  $^{13}\text{C}\{^1\text{H}\}$  NMR spectrum (DMSO- $d_6$ , 100 MHz, 298K) of the reaction mixture after 2 days addition of 4 eq  $^{13}\text{CS}_2$  to a THF solution of **3** at room temperature, removal of the solvent and dissolution in DMSO- $d_6$ .

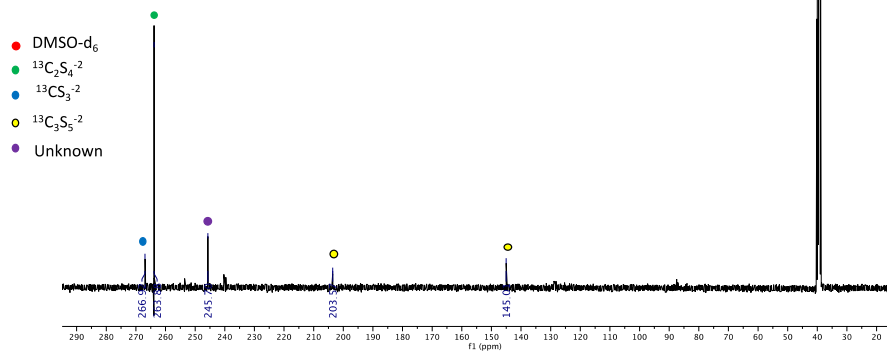

**Figure S21:**  $^{13}\text{C}\{^1\text{H}\}$  NMR (THF- $d_8$ , 151 MHz, 298K) spectrum of the reaction mixture after 6 days addition of 1 equivalent  $^{13}\text{CO}_2$  to a THF solution of **3** at room temperature.

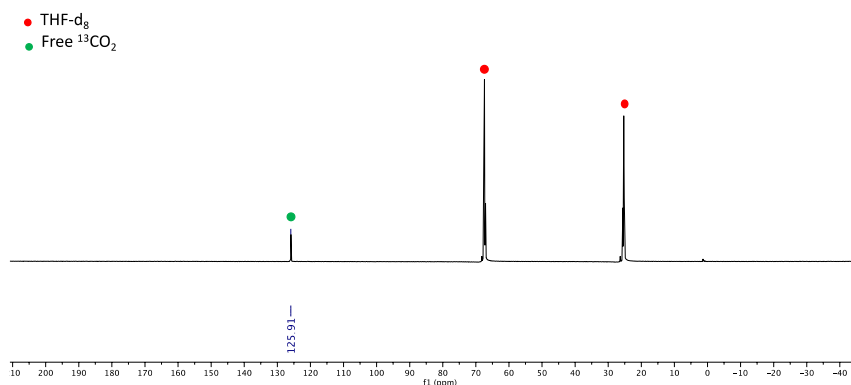

**Figure S22:** Quantitative  $^{13}\text{C}\{^1\text{H}\}$  NMR ( $\text{D}_2\text{O}$ , 151 MHz, 298K) spectrum of the reaction mixture after addition of 1 equivalent  $^{13}\text{CO}_2$  to a THF solution of **3** at room temperature, removal of the solvent and dissolution in basic  $\text{D}_2\text{O}$  (pD=12) using  $^{13}\text{C}$ -labelled sodium acetate as internal standard.

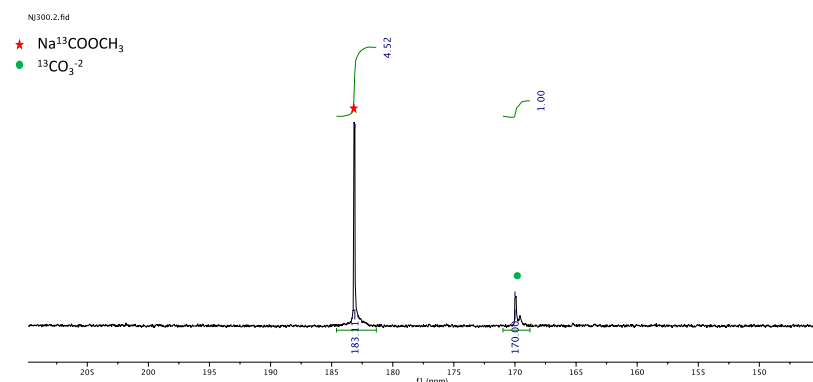

**Figure S23:**  $^1\text{H}$  NMR spectrum (THF- $\text{d}_8$ , 400 MHz, 298K) of the reaction mixture, after addition of 2 eq  $^{13}\text{CO}_2$  to a THF solution of **3** at room temperature

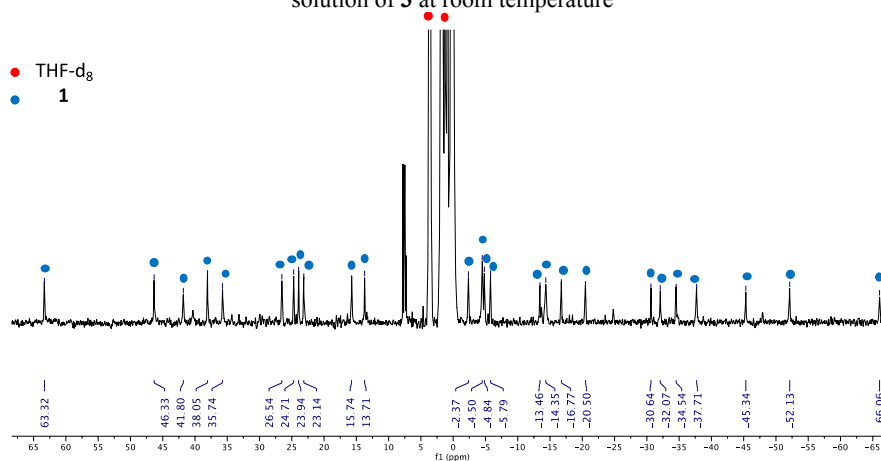

**Figure S24:** Quantitative  $^{13}\text{C}\{^1\text{H}\}$  NMR ( $\text{D}_2\text{O}$ , 151 MHz, 298K) spectrum of the reaction mixture after addition of 2 equivalent  $^{13}\text{CO}_2$  to a THF solution of **3** at room temperature, removal of the solvent and dissolution in basic  $\text{D}_2\text{O}$  (pD=12) using  $^{13}\text{C}$ -labelled sodium acetate as internal standard..

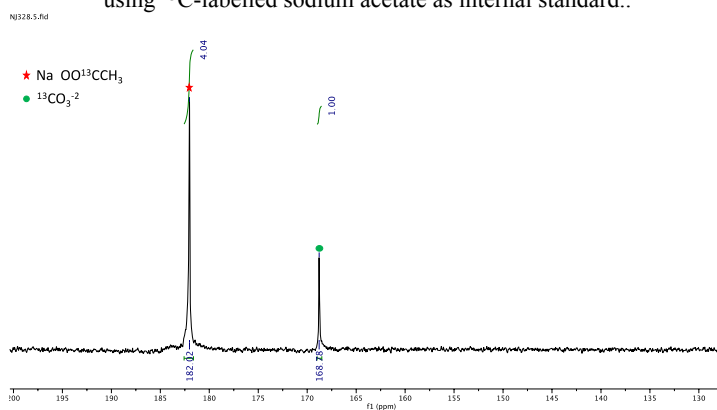

**Figure S25:**  $^1\text{H}$  NMR (THF- $\text{d}_8$ , 400 MHz, 298K) spectra comparison of the evolution of the reaction mixture of the addition 4 equivalents  $^{13}\text{CO}_2$  to a THF solution of **3** at room temperature.

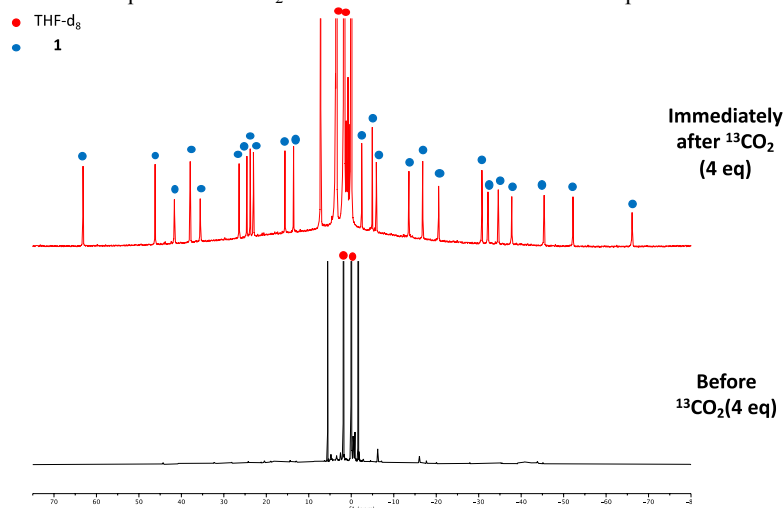

**Figure S26:**  $^{13}\text{C}\{^1\text{H}\}$  NMR (THF- $\text{d}_8$ , 151 MHz, 298K) spectrum of the reaction mixture after 6 days addition of 4 equivalents  $^{13}\text{CO}_2$  to a THF solution of **3** at room temperature.

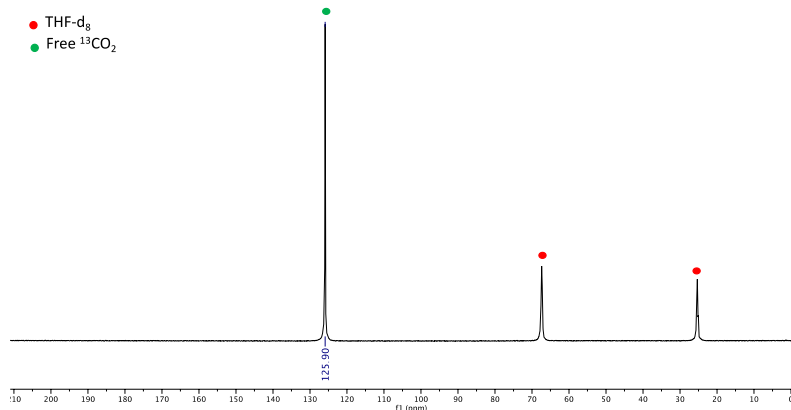

**Figure S27:** Quantitative  $^{13}\text{C}\{^1\text{H}\}$  NMR ( $\text{D}_2\text{O}$ , 151 MHz, 298K) spectrum of the reaction mixture after 6 days addition of 4 equivalents  $^{13}\text{CO}_2$  to a THF solution of **3** at room temperature, removal of the solvent and dissolution in basic  $\text{D}_2\text{O}$  (pD=12) using  $^{13}\text{C}$ -labelled sodium acetate as internal standard.

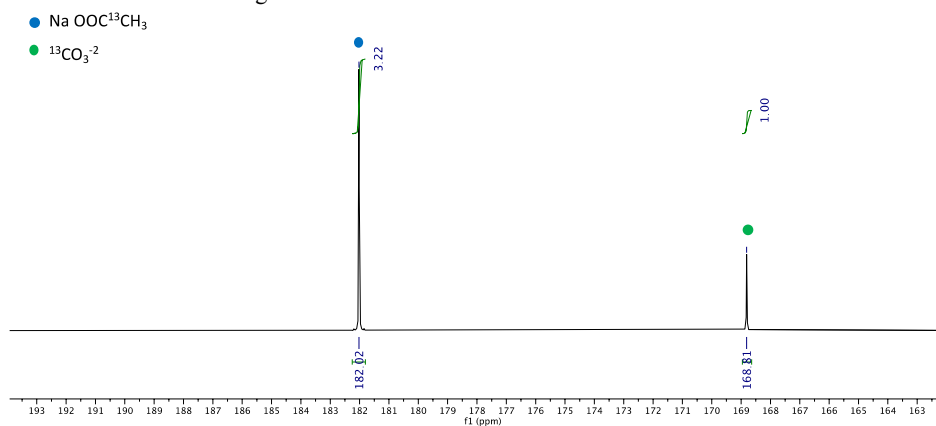

**Figure S28:**  $^1\text{H}$  NMR ( $\text{DMSO}-\text{d}_6$ , 400 MHz, 298K) spectrum of the powder of the reaction mixture after addition of 100 equivalents  $^{13}\text{CO}_2$  to a THF solution of **3** at room temperature.

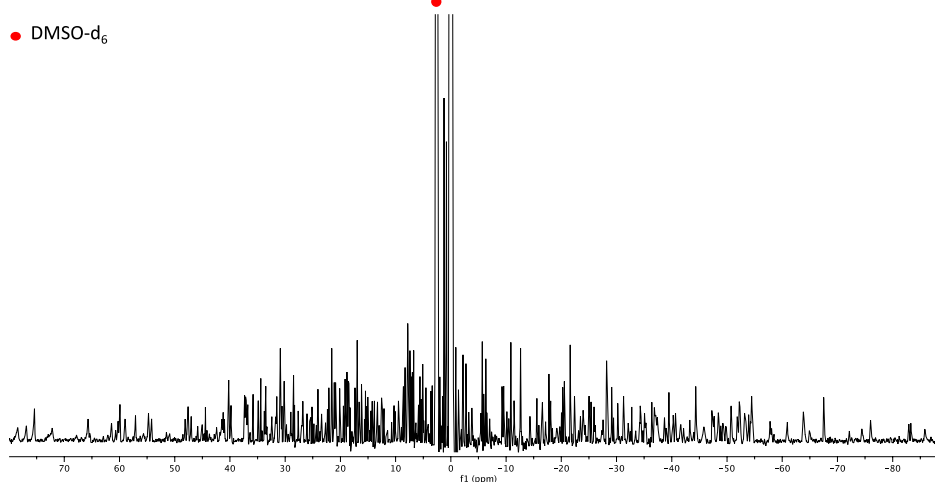

**Figure S29:**  $^{13}\text{C}\{^1\text{H}\}$  NMR (THF- $\text{d}_8$ , 151 MHz, 298K) spectrum of the reaction mixture after 6 days addition of 100 equivalents  $^{13}\text{CO}_2$  to a THF solution of **3** at room temperature.

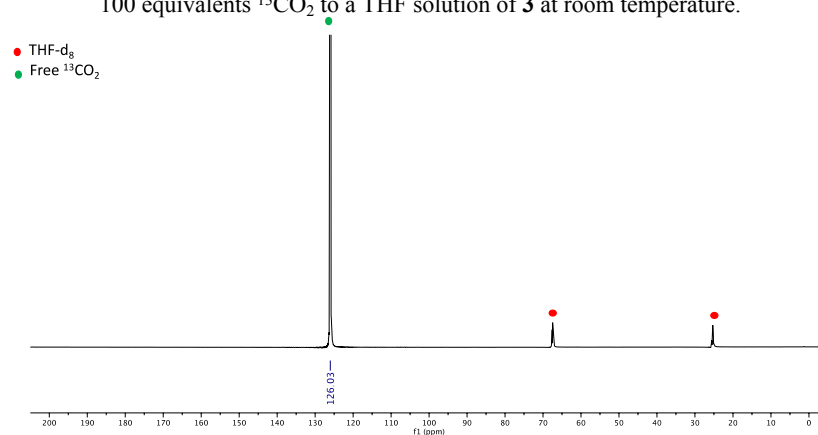

**Figure S30:** Quantitative  $^{13}\text{C}\{^1\text{H}\}$  NMR ( $\text{D}_2\text{O}$ , 151 MHz, 298K) spectrum of the reaction mixture after 6 days addition of 100 equivalents  $^{13}\text{CO}_2$  to a THF solution of **3** at room temperature, removal of the solvent and dissolution in basic  $\text{D}_2\text{O}$  (pD=12) using  $^{13}\text{C}$ -labelled sodium acetate as internal standard.

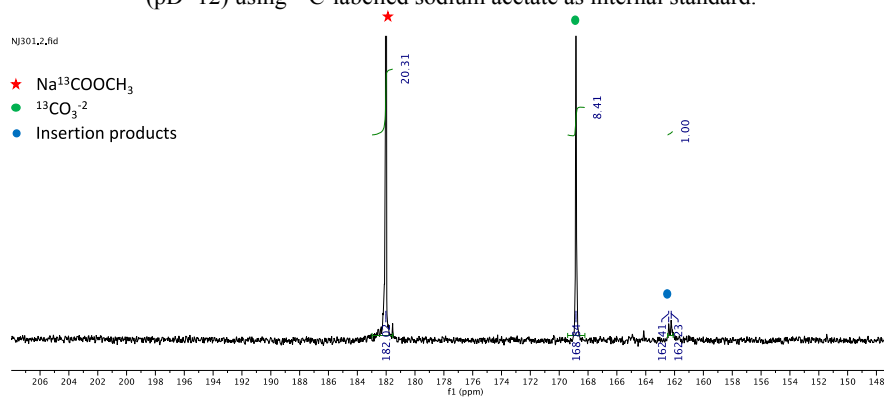

## 2. Mass spectra

**Figure S31:** MS spectra of complex **1**: experimental (up) and theoretical (down) profiles of the peak at  $m/z$  1387

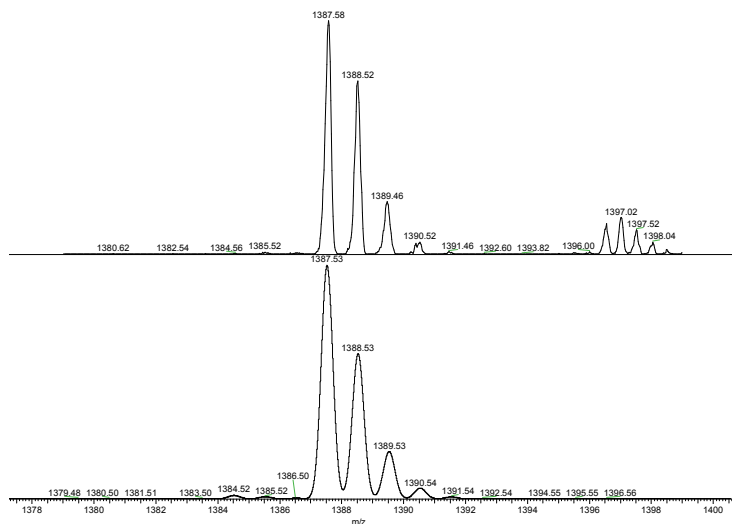

**Figure S32:** MS spectra of reaction mixture of **1** with  $\text{CO}_2$  after 6 days: experimental (up) and theoretical (down) profiles of the peak at  $m/z$  1431

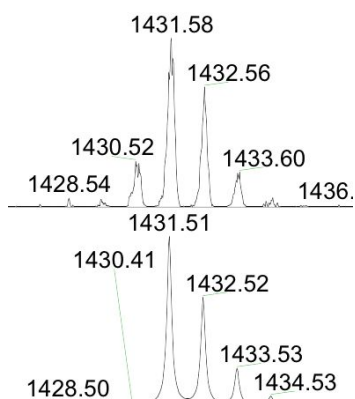

### 3. Electrochemistry

**Figure S33** Room temperature cyclic voltammogram of complex  $[U_2(\text{bis-trensal})]$  **1** recorded in 0.1 M  $[\text{NBu}_4][\text{PF}_6]$  in 4 mM pyridine solution at 100 mV/sec scan rate, referenced against  $[\text{Fe}(\text{C}_5\text{H}_5)_2]^+ / [\text{Fe}(\text{C}_5\text{H}_5)_2]$ .

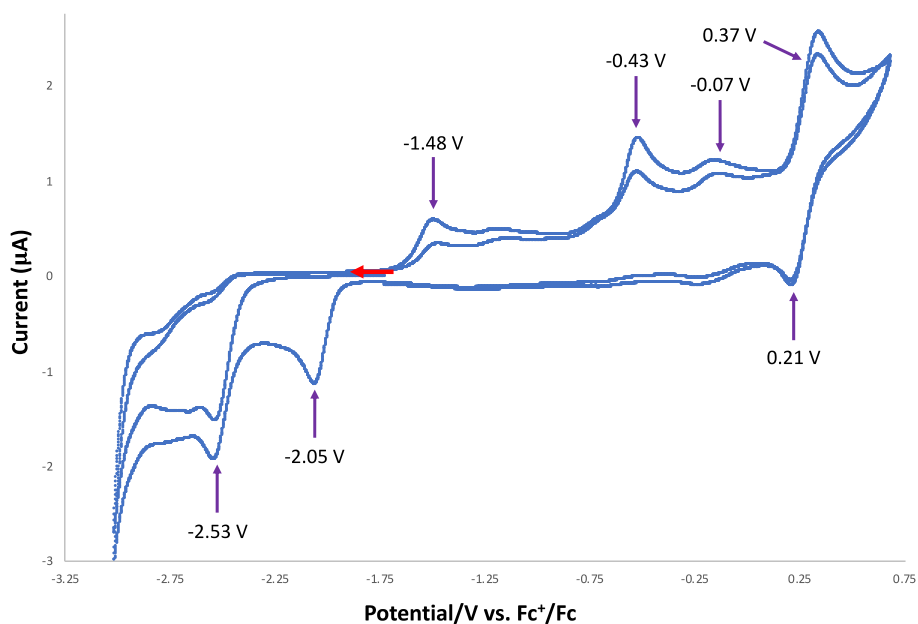

**Figure S34** Room temperature cyclic voltammogram of complex  $[U_2(\text{bis-trensal})]$  **1** recorded in 0.1 M  $[\text{NBu}_4][\text{PF}_6]$  in 4 mM pyridine solution, referenced against  $[\text{Fe}(\text{C}_5\text{H}_5)_2]^+ / [\text{Fe}(\text{C}_5\text{H}_5)_2]$ , at different scan rates 50 mV/sec (blue), 100 mV/sec (orange), 500 mV/sec (grey) and 1000 mV/sec (yellow).

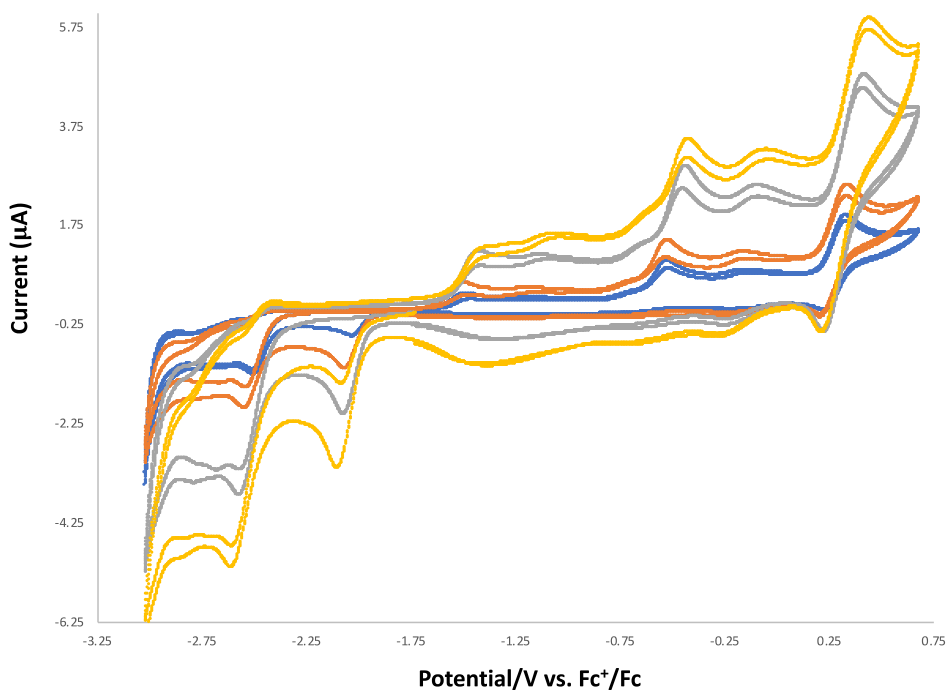

**Figure S35** Room temperature cyclic voltammogram of complex  $[\text{U}(\text{trens})][\text{OTf}]$  **2** recorded in 0.1 M  $[\text{NBu}_4][\text{PF}_6]$  in 4 mM pyridine solution at 100 mV/sec scan rate, referenced against  $[\text{Fe}(\text{C}_5\text{H}_5)_2]^+ / [\text{Fe}(\text{C}_5\text{H}_5)_2]$ .

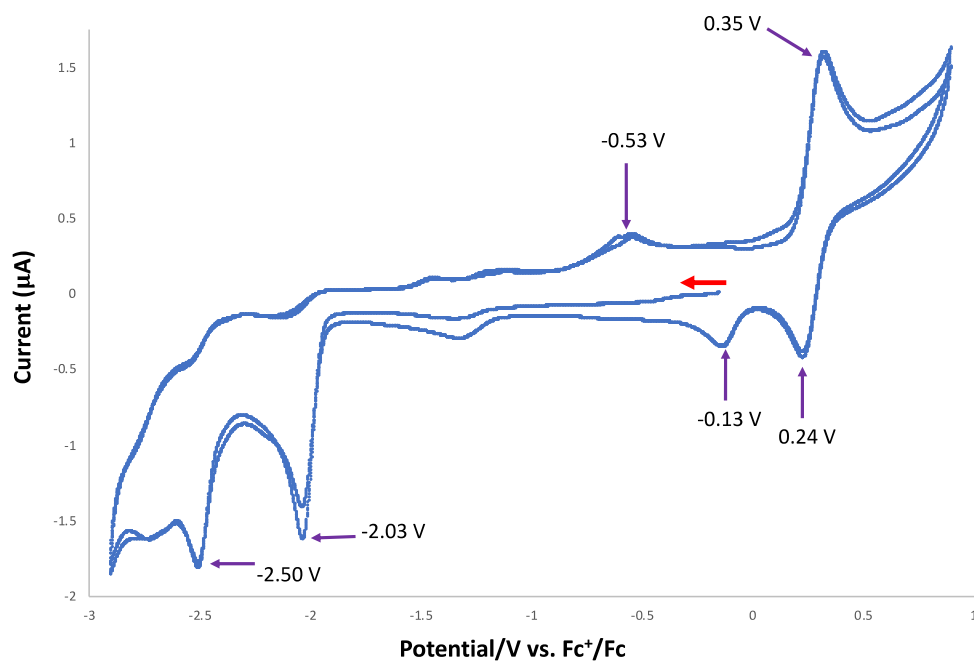

**Figure S36** Room temperature cyclic voltammogram of complex  $[\text{U}(\text{trens})][\text{OTf}]$  **2** recorded in 0.1 M  $[\text{NBu}_4][\text{PF}_6]$  in 4 mM pyridine solution, referenced against  $[\text{Fe}(\text{C}_5\text{H}_5)_2]^+ / [\text{Fe}(\text{C}_5\text{H}_5)_2]$ , at different scan rates 50 mV/sec (blue), 100 mV/sec (orange), 500 mV/sec (grey) and 1000 mV/sec (yellow).

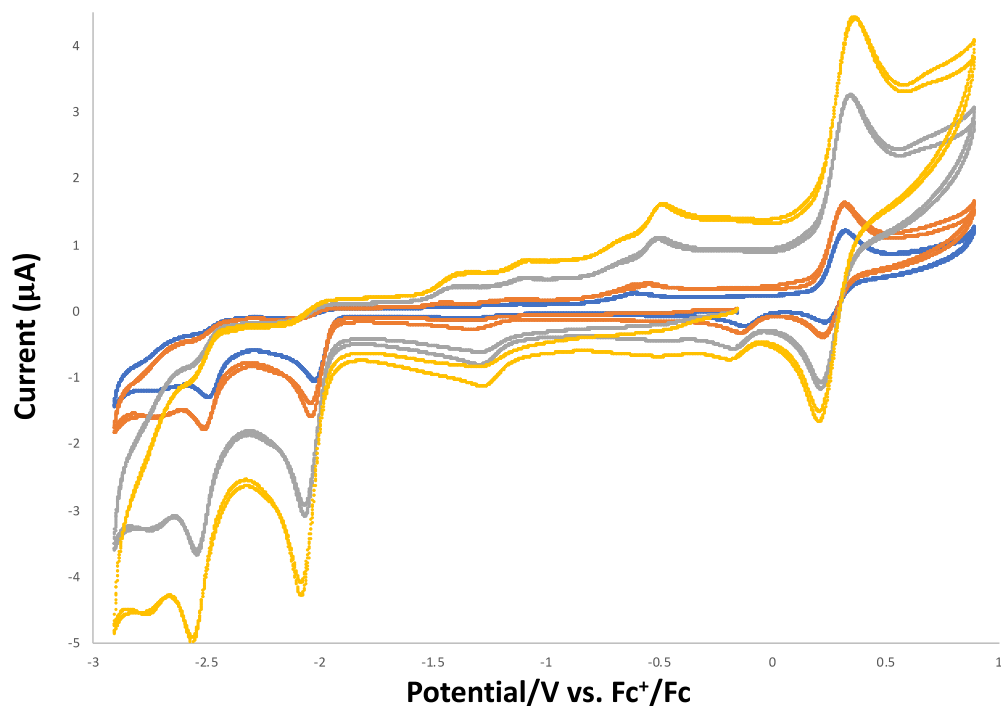



**Figure S37** Room temperature cyclic voltammogram of complex  $[\{K(THF)_3\}_2U_2(\text{cyclo-trens})]$  **3-THF** recorded in 0.1 M  $[NBu_4][PF_6]$  in 4 mM pyridine solution in presence of excess cryptand, at 100 mV/sec scan rate, referenced against  $[Fe(C_5H_5)_2]^+/[Fe(C_5H_5)_2]$ .

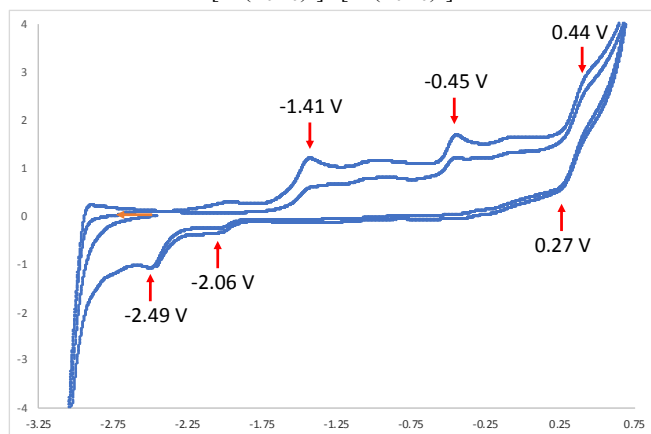

**Figure S38** Room temperature cyclic voltammogram of complex  $[\{K(THF)_3\}_2U_2(\text{cyclo-trens})]$  **3-THF** recorded in 0.1 M  $[NBu_4][PF_6]$  in 4 mM pyridine solution in presence of excess cryptand, referenced against  $[Fe(C_5H_5)_2]^+/[Fe(C_5H_5)_2]$ , at different scan rates 50 mV/sec (blue), 100 mV/sec (orange), 500 mV/sec (grey) and 1000 mV/sec (yellow).

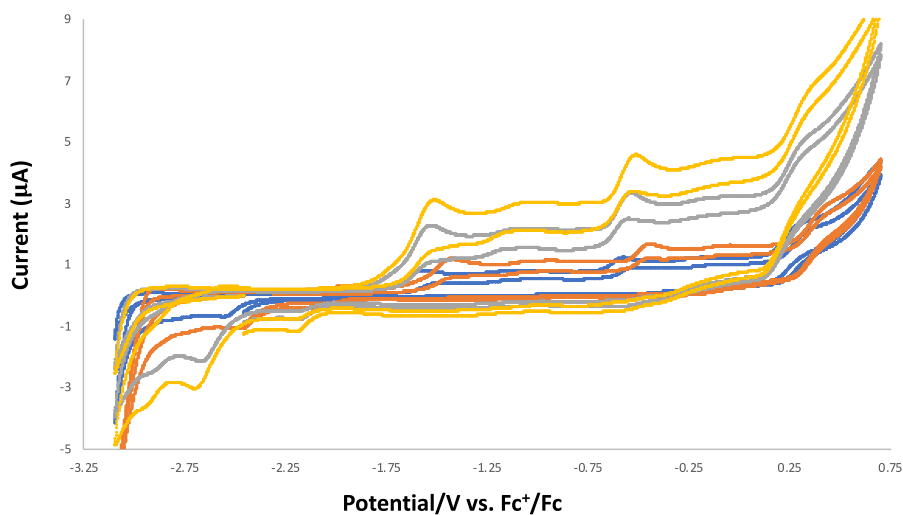

**Figure S39** Room temperature cyclic voltammogram of complex  $[U_2(\text{bis-trensal})]$  **1** recorded in 0.1 M  $[\text{NBu}_4][\text{PF}_6]$  in 4 mM pyridine solution at 100 mV/sec scan rate, referenced against  $[\text{Fe}(\text{C}_5\text{H}_5)_2]^+ / [\text{Fe}(\text{C}_5\text{H}_5)_2]$ .

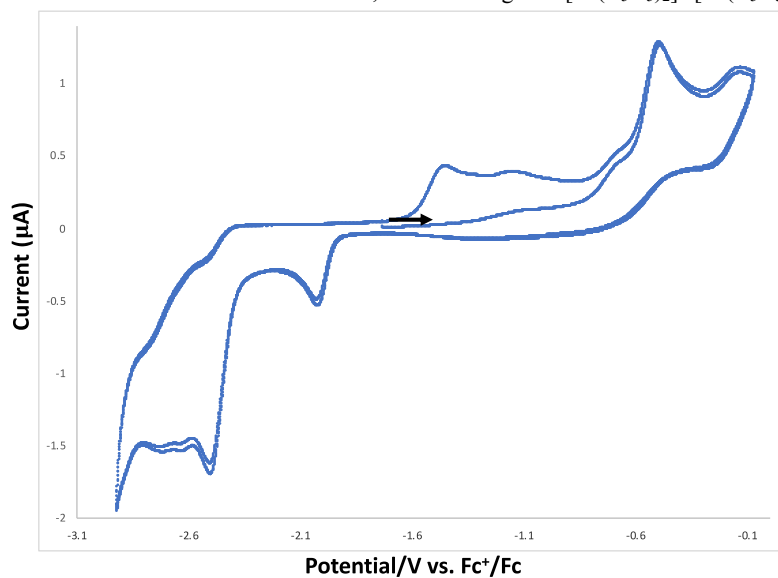

**Figure S40** Room temperature cyclic voltammogram of complex  $[U_2(\text{bis-trensal})]$  **1** recorded in 0.1 M  $[\text{NBu}_4][\text{PF}_6]$  in 4 mM THF solution at 100 mV/sec scan rate, referenced against  $[\text{Fe}(\text{C}_5\text{H}_5)_2]^+ / [\text{Fe}(\text{C}_5\text{H}_5)_2]$ .

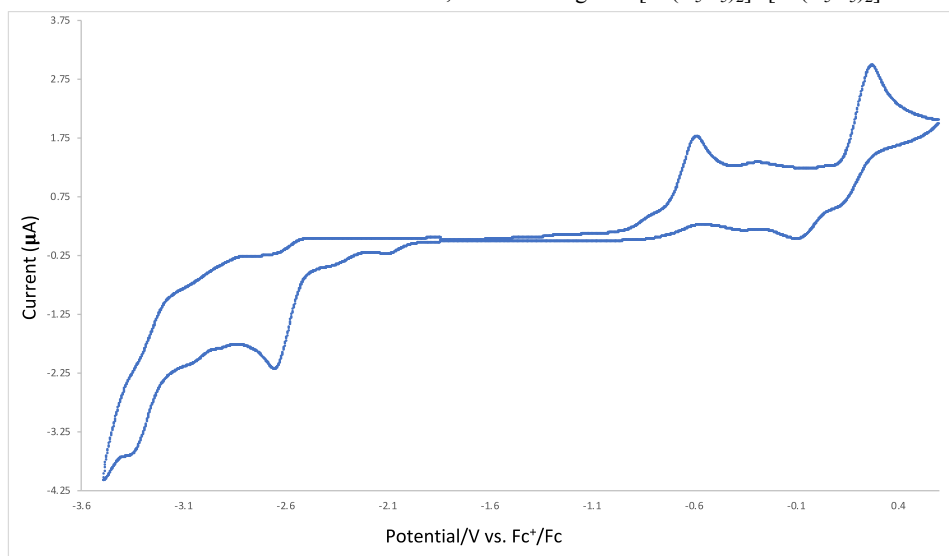

**Figure S41** Room temperature cyclic voltammogram of complex  $[\text{U}(\text{trens})][\text{OTf}]$  **2** recorded in 0.1 M  $[\text{NBu}_4][\text{PF}_6]$  in 4 mM solution THF solution at 100 mV/sec scan rate, referenced against  $[\text{Fe}(\text{C}_5\text{H}_5)_2]^+ / [\text{Fe}(\text{C}_5\text{H}_5)_2]$ .

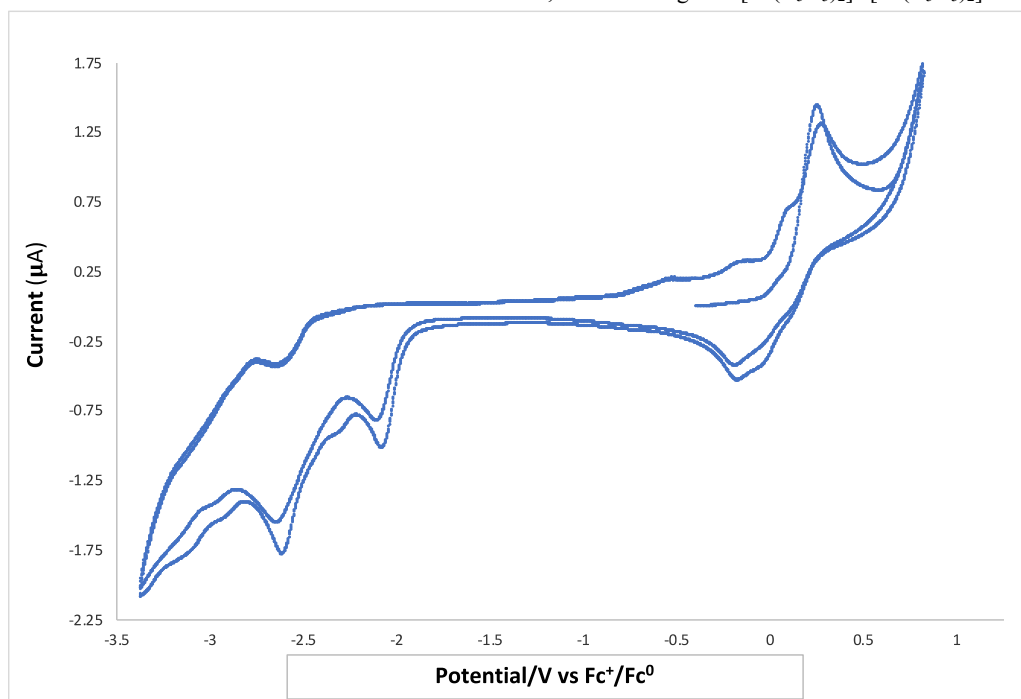

## 4. UV-vis spectroscopy

**Figure S42** UV-vis spectrum at room temperature of a 5mM solution of [U(trensal)][OTf], **2** in THF.

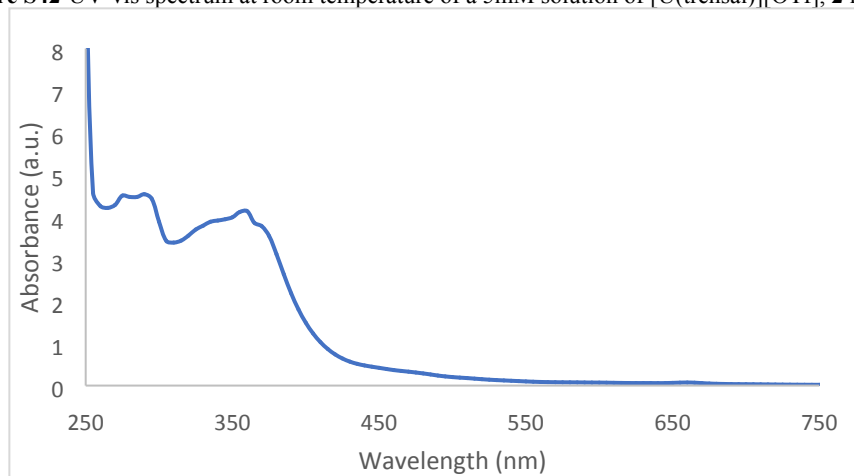

**Figure S43** UV-vis spectrum at room temperature of a 5mM solution of [U(bis-trensal)], **1** in THF.

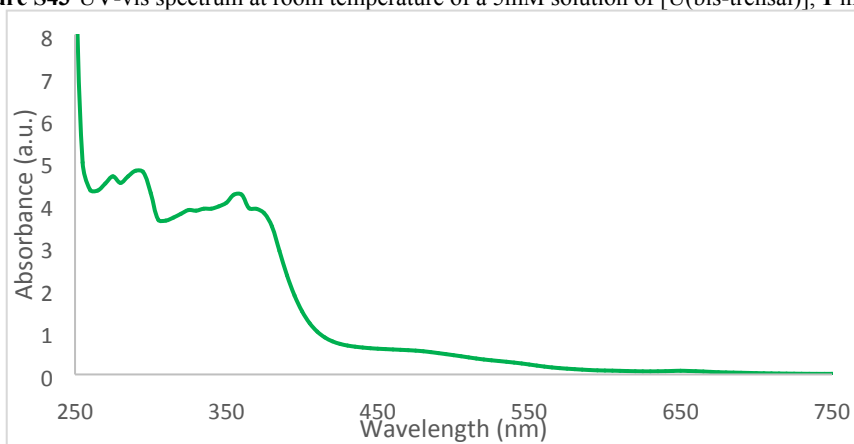

**Figure S44** UV-vis spectrum at room temperature of a 5mM solution of [ $\{K(THF)_3\}_2U_2(\text{cyclo-trensal})$ ], **3-THF** in THF.

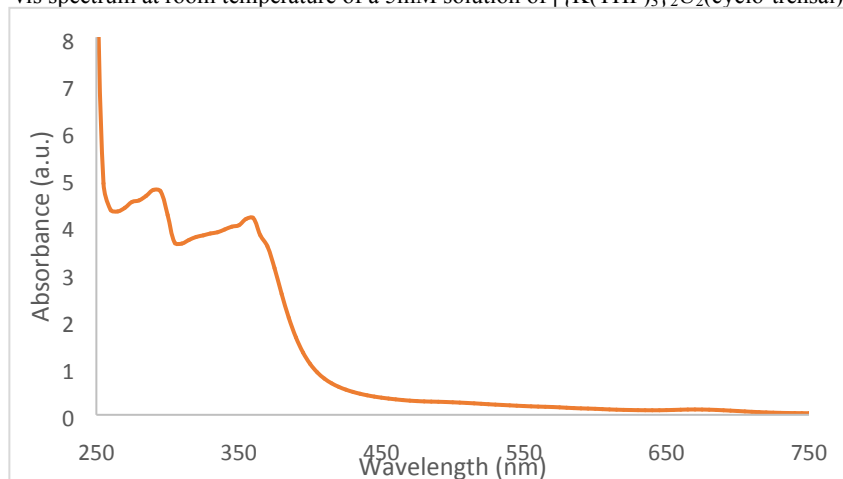

## 5. X-ray crystallographic data

**Figure S45** Molecular structure of complex **4**. Hydrogen atoms and THF molecules were omitted for clarity. Color code: uranium (green), nitrogen (blue), oxygen (red), carbon (grey), C-C bond between imine (yellow).

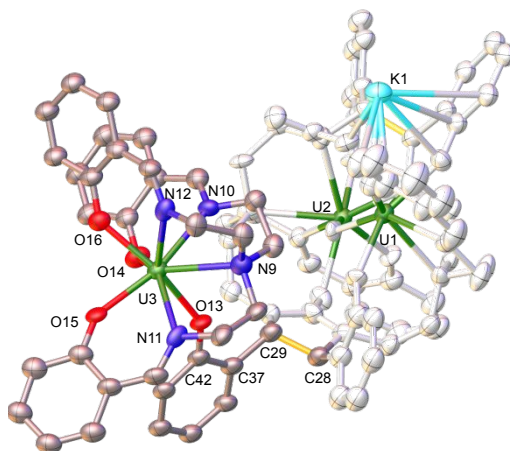

**Table S1.** X-ray crystallographic data.

| Compound                                        | <b>1a</b>                                                                      | <b>2</b>                                                                        | <b>3-Py.</b> (pyridine)                                                                        | <b>4</b>                                                                         |
|-------------------------------------------------|--------------------------------------------------------------------------------|---------------------------------------------------------------------------------|------------------------------------------------------------------------------------------------|----------------------------------------------------------------------------------|
| Formula                                         | C <sub>102</sub> H <sub>150</sub> N <sub>8</sub> O <sub>6</sub> U <sub>2</sub> | C <sub>28</sub> H <sub>27</sub> F <sub>3</sub> N <sub>4</sub> O <sub>6</sub> SU | C <sub>88</sub> H <sub>88</sub> K <sub>2</sub> N <sub>14.8</sub> O <sub>6</sub> U <sub>2</sub> | C <sub>95</sub> H <sub>105</sub> KN <sub>12</sub> O <sub>16</sub> U <sub>3</sub> |
| Crystal size [mm]                               | 0.13×0.07×0.04                                                                 | 0.32×0.10×0.05                                                                  | 0.25×0.21×0.08                                                                                 | 0.43×0.27×0.23                                                                   |
| Crystal system                                  | Triclinic                                                                      | Trigonal                                                                        | Triclinic                                                                                      | Triclinic                                                                        |
| Space group                                     | P -1                                                                           | $P\bar{3}c1$                                                                    | P -1                                                                                           | P -1                                                                             |
| V [Å <sup>3</sup> ]                             | 2700.5(9)                                                                      | 3238.8(5)                                                                       | 2064.0(16)                                                                                     | 4772.1(4)                                                                        |
| a [Å]                                           | 11.0515(12)                                                                    | 15.2336(10)                                                                     | 11.872(3)                                                                                      | 13.9739(7)                                                                       |
| b [Å]                                           | 15.966(4)                                                                      | 15.2336(10)                                                                     | 12.416(6)                                                                                      | 17.1424(5)                                                                       |
| c [Å]                                           | 16.284(2)                                                                      | 16.1157(10)                                                                     | 15.141(8)                                                                                      | 21.3152(9)                                                                       |
| α [°]                                           | 70.59(2)                                                                       | 90                                                                              | 91.66(4)                                                                                       | 84.872(3)                                                                        |
| β [°]                                           | 85.304(12)                                                                     | 90                                                                              | 107.63(3)                                                                                      | 82.993(4)                                                                        |
| γ [°]                                           | 87.757(14)                                                                     | 120                                                                             | 102.69(3)                                                                                      | 70.549(4)                                                                        |
| Z                                               | 1                                                                              | 4                                                                               | 1                                                                                              | 2                                                                                |
| Absorption coefficient [mm <sup>-1</sup> ]      | 4.287                                                                          | 4.324                                                                           | 4.324                                                                                          | 4.941                                                                            |
| F (000)                                         | 1050                                                                           | 1624                                                                            | 989.6                                                                                          | 2364.0                                                                           |
| T [K]                                           | 100(2)                                                                         | 100(2)                                                                          | 100(2)                                                                                         | 140(10)                                                                          |
| Total no. reflexions                            | 30.886                                                                         | 39917                                                                           | 30691                                                                                          | 31290                                                                            |
| Unique reflexions [R(int)]                      | 9511 [0.1473]                                                                  | 2488 [0.0942]                                                                   | 9446 [0.1031]                                                                                  | 16858 [0.0473]                                                                   |
| Final R indice [I>2σ(I)]                        | 0.0812                                                                         | 0.0549                                                                          | 0.0766                                                                                         | 0.0740                                                                           |
| Largest diff. peak and hole [eÅ <sup>-3</sup> ] | 1.182 and -1.491                                                               | 2.622 and -1.056                                                                | 2.036 and -1.705                                                                               | 4.504 and -2.751                                                                 |
| GOF                                             | 1.024                                                                          | 1.109                                                                           | 1.100                                                                                          | 1.078                                                                            |
